# Supplementary material for: Myrcene and terpene regulation of TRPV1
Source: PubMed Central journal article supplement (PMC6768052; doi:10.1080/19336950.2019.1654347), 2019-08-26

# SUPPLEMENTAL FIGURE 1.

| Table III                                                                                                                                                     | TMS Pain Formulation                                                                                                                                                                                                                                                                                                                                                                                                             |                                                                                                                                              |                                                                                                                                                                                                                                                                  |                                                                                                                                                 |
|---------------------------------------------------------------------------------------------------------------------------------------------------------------|----------------------------------------------------------------------------------------------------------------------------------------------------------------------------------------------------------------------------------------------------------------------------------------------------------------------------------------------------------------------------------------------------------------------------------|----------------------------------------------------------------------------------------------------------------------------------------------|------------------------------------------------------------------------------------------------------------------------------------------------------------------------------------------------------------------------------------------------------------------|-------------------------------------------------------------------------------------------------------------------------------------------------|
|                                                                                                                                                               | Kampo                                                                                                                                                                                                                                                                                                                                                                                                                            |                                                                                                                                              | TCM                                                                                                                                                                                                                                                              |                                                                                                                                                 |
|                                                                                                                                                               | <i>Goshajinkigan</i>                                                                                                                                                                                                                                                                                                                                                                                                             | <i>Goshuyuto</i>                                                                                                                             | <i>Xie Xin Tang</i>                                                                                                                                                                                                                                              | <i>Si Mo Tang</i>                                                                                                                               |
| <b>Plant composition</b>                                                                                                                                      | Jukujio ( <i>Rehmanniae Radix preparata</i> ), Goshitsu ( <i>Achyranthis bidentatae</i> ), Sanshuyu ( <i>Corni fructus</i> ), Sanyaku ( <i>Dioscoreae rhizoma</i> ), Shazenshi ( <i>Plantaginis semen.</i> ), Takusha ( <i>Alismatis Rhizoma</i> ), Bukuryo ( <i>Sclerotium Poriae Cocos</i> ), Botanpi ( <i>Paeoniae Moutan Cortex</i> ), Keihi ( <i>Cinnamomi Cortex</i> ), Bushi ( <i>Aconiti Radix lateralis preparata</i> ) | Goshuyu ( <i>Evodiae Fructus</i> ), Ninjin ( <i>Ginseng Radix</i> ), Taiso ( <i>Jujubae Fructus</i> ), Shokyo ( <i>Zingiberis Rhizoma</i> ). | Hange ( <i>Pinelliae Rhizoma</i> ), Ogon ( <i>Scutellariae Radix</i> ), Oren ( <i>Coptidis Rhizoma</i> ), Ninjin ( <i>Ginseng Radix</i> ), Kankyo ( <i>Zingiberis Siccatum Rhizoma</i> ), Kanzo ( <i>Glycyrrhizae Radix</i> ), Taiso ( <i>Jujubae Fructus</i> ). | Lignum Aquilariae Resinatum ( <i>Aquilaria agallocha Roxb</i> )<br>Arecae Semen ( <i>Areca catechu</i> ), Ginseng ( <i>Panax notoginseng</i> ). |
| <b>Bioactive compounds</b>                                                                                                                                    | 374                                                                                                                                                                                                                                                                                                                                                                                                                              | 373                                                                                                                                          | 498                                                                                                                                                                                                                                                              | 208                                                                                                                                             |
| <b>Convergent Compounds</b>                                                                                                                                   | 123                                                                                                                                                                                                                                                                                                                                                                                                                              | 16                                                                                                                                           |                                                                                                                                                                                                                                                                  | 28                                                                                                                                              |
| <b>Nocioceptive TRP ligands represented in compound sets:</b> Myrcene, piperine, camphor, vanillin, cinnamaldehyde, geraniol, eugenol, gingerol, ginsenosides |                                                                                                                                                                                                                                                                                                                                                                                                                                  |                                                                                                                                              |                                                                                                                                                                                                                                                                  |                                                                                                                                                 |

# SUPPLEMENTAL FIGURE 2.

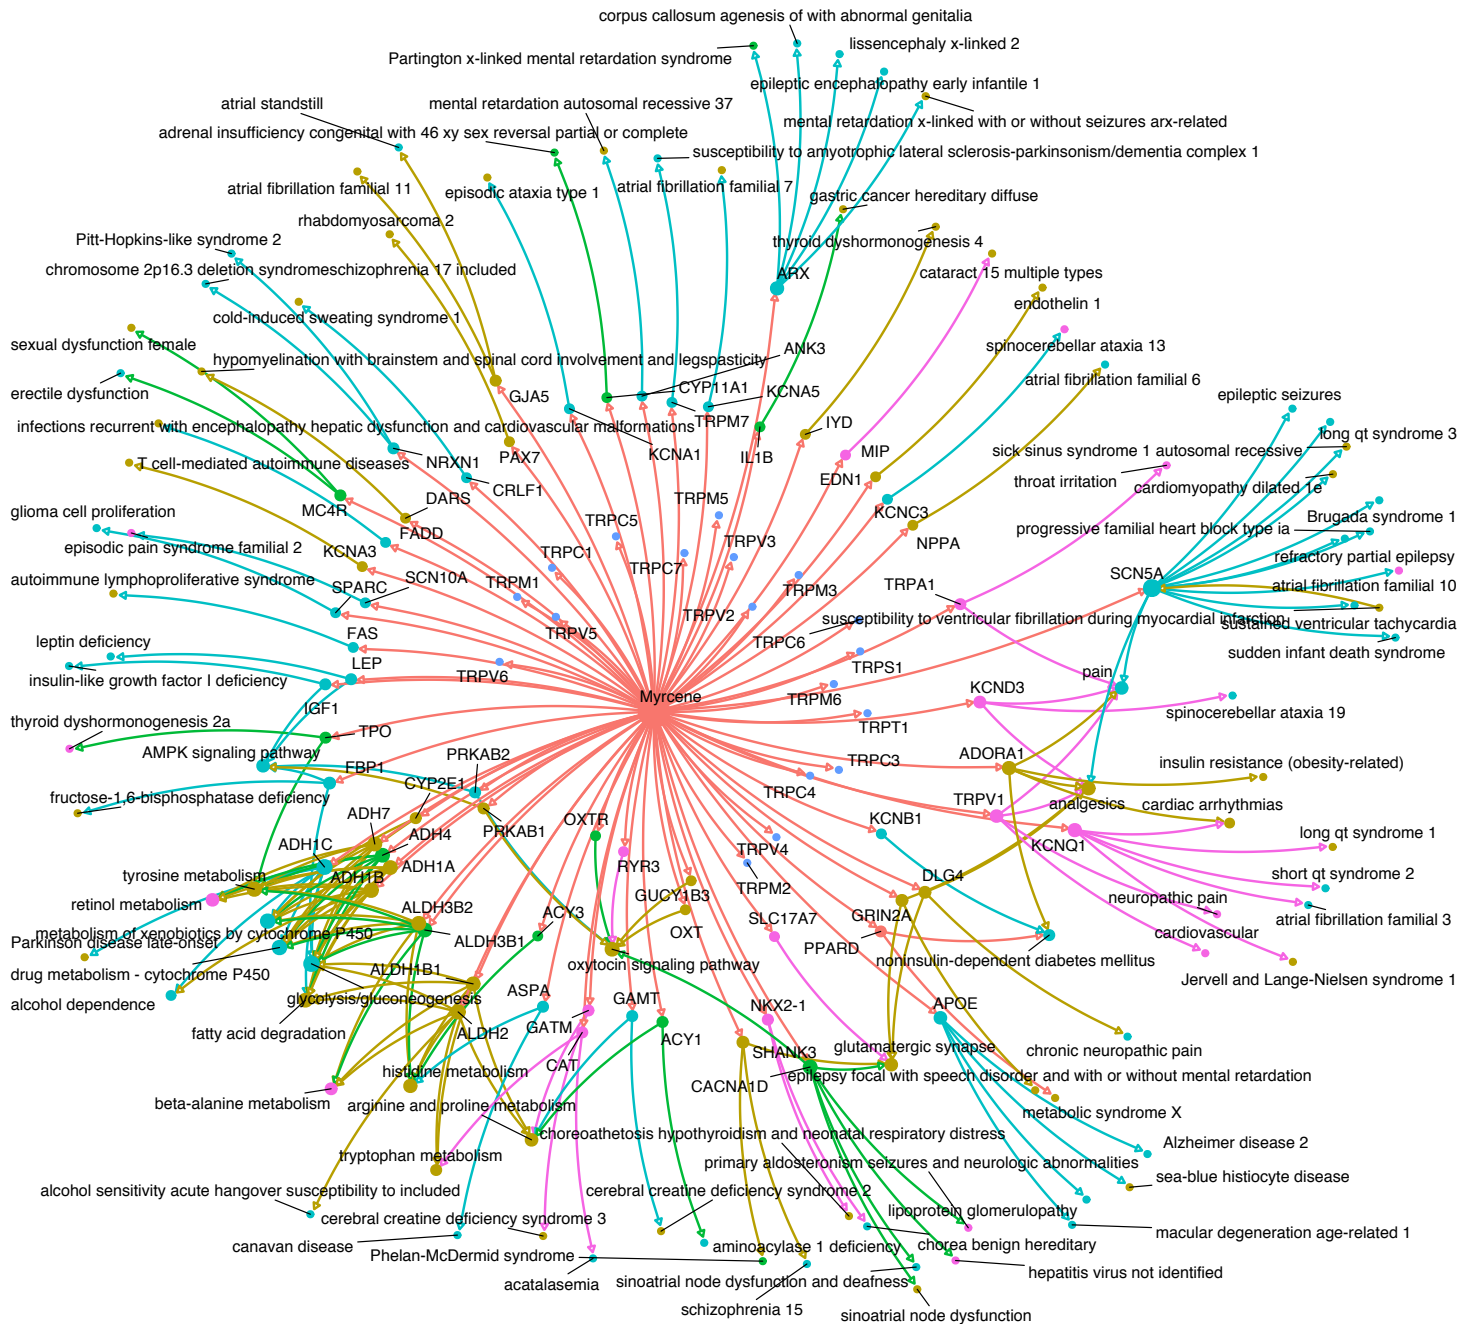

## Degree

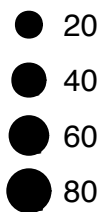

## Group

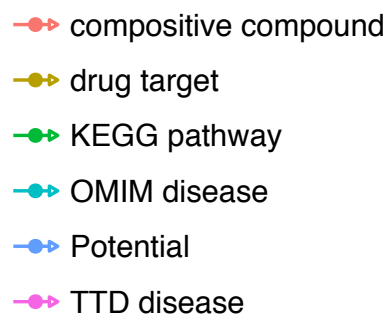

Supplement: kchl-13-01-1654347-s001.pdf [file kchl-13-01-1654347-s001.pdf]
